# Supplementary material
Source: PubMed Central journal article supplement (PMC6330155)

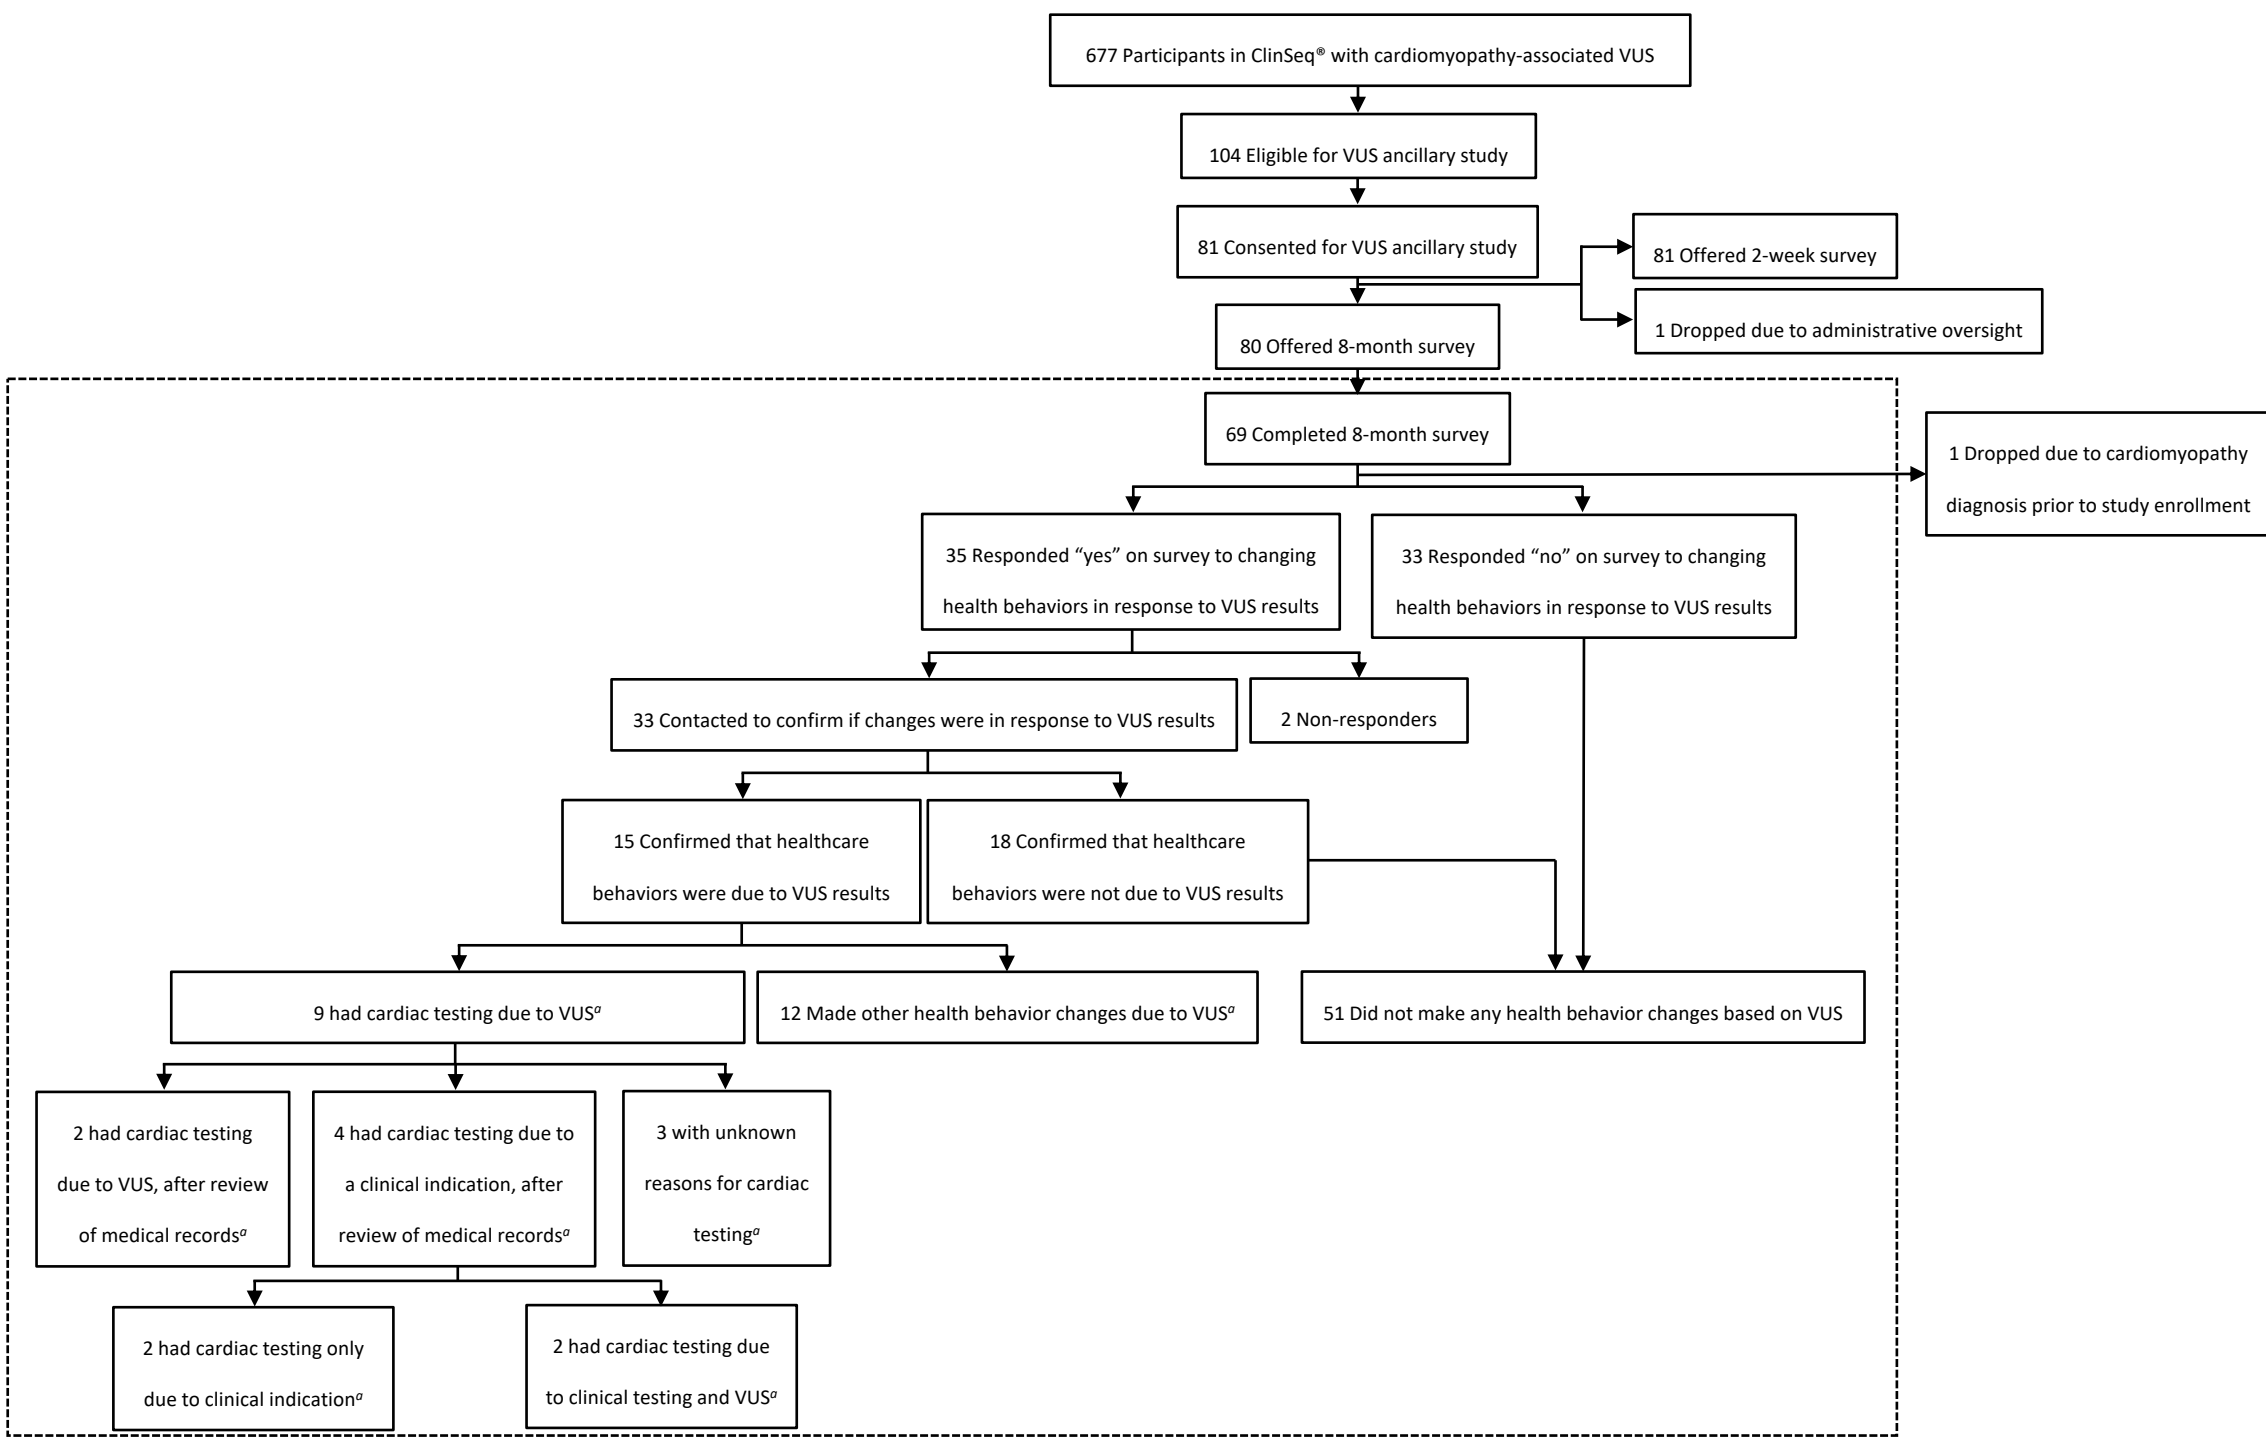

Supplement: NIHMS973103-supplement-Supplementary___Appendix__online_only_material__etc___2.pdf [file NIHMS973103-supplement-Supplementary___Appendix__online_only_material__etc___2.pdf]
